# Open-source personal pipetting robots with live-cell incubation and microscopy compatibility

*Philip Dettinger<sup>1\*</sup>, Tobias Kull<sup>1</sup>, Geethika Arekatla<sup>1</sup>, Nouraz Ahmed<sup>1</sup>, Yang Zhang<sup>1</sup>, Florin Schneider<sup>1</sup>, Arne Wehling<sup>1</sup>, Daniel Schirmacher<sup>1</sup>, Shunsuke Kawamura<sup>1</sup>, Dirk Loeffler<sup>1</sup> & Timm Schroeder<sup>1\*</sup>*

1. Department of Biosystems Science and Engineering, ETH Zurich, Basel, Switzerland

Corresponding Authors:

\*Timm Schroeder

Address: ETH Zurich, BSA N 840, Mattenstrasse 26, 4058 Basel, Switzerland

Tel: +41 61 387 33 92

Email: [timm.schroeder@bsse.ethz.ch](mailto:timm.schroeder@bsse.ethz.ch)

\*Philip Dettinger

Address: ETH Zurich, BSA N 840, Mattenstrasse 26, 4058 Basel, Switzerland

Tel: +41 61 387 34 16

Email: [philip.dettinger@bsse.ethz.ch](mailto:philip.dettinger@bsse.ethz.ch)

## Abstract

Liquid handling robots have the potential to automate many procedures in life sciences. However, they are not in widespread use in academic settings, where funding, space and maintenance specialists are usually limiting. In addition, current robots require lengthy programming by specialists and are incompatible with most academic laboratories with constantly changing small-scale projects. Here, we present the Pipetting Helper Imaging Lid (PHIL), an inexpensive, small, open-source personal liquid handling robot. It is designed for inexperienced users, with self-production from cheap commercial and 3D-printable components and custom control software. PHIL successfully automated pipetting for e.g. tissue immunostainings and stimulations of live stem and progenitor cells during time-lapse microscopy. PHIL is cheap enough for any laboratory member to have their own personal pipetting robot(s), and enables users without programming skills to easily automate a large range of experiments.

## Introduction

Liquid handling and pipetting tools are important in biological research but are often limited to specific industries and tasks. They automate time consuming and repetitive experimental procedures, reduce personnel cost and can enable otherwise impossible complex dynamic or high-throughput experiments. Many robotic liquid handling platforms exist, but they are useful only for a limited range of applications, usually in industrial high-throughput settings.<sup>1,2</sup> First, liquid handling machines are very expensive and require a lot of room.<sup>3</sup> Second, programming these robots for new projects is very complex and slow, usually requiring dedicated experts. This makes them impractical for most academic groups with many small-scale projects with constantly changing low throughput requirements. While costs for purchasing or building pipetting robots are decreasing<sup>3-10</sup>, researchers remain limited by programming requirements and the experimental procedures that liquid handling robots can automate.

This is true in particular for live cell cultures during time-lapse microscopy. Manually pipetting complex and dynamic liquid sequences during live cell microscopy experiments is labor intensive, requiring precisely controlled interventions by skilled researchers whose time is blocked during these long procedures. This also often interrupts culture conditions and can obscure fast responses in the observed cells. Automated pipetting would thus be very helpful for these experiments but is particularly challenging for existing robots. Complex and expensive machinery is typically used to move culture vessels to/from dedicated microscopes, which also prevents rapid culture media changes during live cell microscopy. Liquid handling robots that are integrated with advanced microscopes have also been developed.<sup>8</sup> However, most of these systems lack environmental control equipment and are limited to specific imaging modalities that are not suitable for observing all cellular processes.<sup>8</sup>

Other automated methods utilizing pump arrays connected to a single culture vessel have been developed that can conduct preprogrammed sample washing procedures during microscopy.<sup>11</sup> While these methods are optimized for small numbers of culture conditions, they do not scale well to studies with many different conditions to be simultaneously analyzed, as each vessel generally requires a complete set of pumps, fluids, and microscopes. This also demands significant technical expertise to implement in large numbers and can become cost- and time-prohibitive very quickly. Other methods that utilize single pipets to transfer liquids from multi-well plates to microfluidic devices during microscopy experiments have been published,<sup>12</sup> but these approaches are limited to specific microfluidic devices and are not optimized for diverse and simultaneous test conditions.

Large-scale integrated microfluidics<sup>13-15</sup> enable automated cell culture interventions over long periods during time-lapse microscopy under environmentally controlled conditions.<sup>14,16</sup> However, available designs suffer from several shortcomings that interfere with their widespread implementation and use.<sup>17</sup> They require significant investment in training and equipment for production, as well as extensive experience for successful operation.<sup>17</sup> Given the porous nature of the polydimethylsiloxane (PDMS) used to construct them, they cannot be reused, further increasing the time and cost required for their use while reducing their reproducibility between users.<sup>18,19</sup> Highly specialized chips are

generally optimized for one specific procedure, further limiting their use in academic lab environments with constantly changing experimental requirements.<sup>20</sup> Due to a lack of standardization between designs, microfluidic chips are often not compatible with commonly available scientific equipment for single-cell analysis without time-consuming and complex cell isolation procedures.<sup>21</sup> Microfluidic devices intended for efficient long-term time-lapse microscopy and endpoint analysis have been developed;<sup>22–26</sup> however, no single device has been proposed that can replicate the ease of use, cost efficiency, and interoperability of standard cell culture vessels such as multi-well plates.

Here, we present a liquid handling robot that can automate a variety of experimental procedures in standard cell culture vessels. The Pipetting Helper Imaging Lid (PHIL) is small enough to be installed almost anywhere, including on most microscope stages, and automates complex liquid handling sequences while also allowing conditioning of the incubation gas atmosphere. PHIL is cheap to self-manufacture by inexperienced users using common 3D printing equipment and fast assembly with commercial parts. In combination with a custom made intuitive graphic user interface (GUI), PHIL enables a variety of experimental procedures including, for example, automated immunostaining of fixed cells and dynamic interventions in live cell cultures during long-term time-lapse microscopy experiments.

## Results

### Design of a stage top robot for automated cell culture interventions

We developed a liquid handling robot that utilizes a 5-bar planar geometry to position between 1 and 10 reusable pipets in any region of a standard multi-well plate (Fig. 1a). It is small and light enough to install on microscope stages (Fig. 1a). Cell culture plates therefore do not have to be removed from the microscope for pipetting. All components are 3D printable or cheap commercially available standard parts (Fig. 1a & 1b).

Pipet positions are determined by two stepper motors that rotate independent 65 mm arms connected in a planar configuration by two freely rotating 145 mm links (Suppl. Fig. 1 & Supplementary Movie 1). One of these links has a claw protruding 1 cm perpendicular to its axis of rotation (Suppl. Fig. 1). These lengths were chosen to optimize the effective working area while keeping the device small enough for stage-top use, and to eliminate the possibility of joint configurations that could render the device inoperable. All freely rotating connections feature an 8 mm steel ball bearing to prevent binding. Robot arms are raised and lowered by two stepper motors placed on each side of the manipulator arms and connected to the arm carrying platform via a 3D printed screw drive mechanism (Suppl. Fig. 2). Limit switches installed at the base of each arm and parallel to the screw drives provide homing functionality during operation. The 5-bar planar configuration was selected over Cartesian designs due to chamber volume and speed requirements.

PHIL can be configured to dispense liquids through 1 to 9 separate tube channels and easily produced reusable pipets in addition to a dedicated pipet for waste aspiration. Pipets are tightly clustered in mounting bracket held by the robotic arm. Each pipet is connected to a custom-designed peristaltic pump and media reservoir via Teflon tubing (Fig. 1c). Control of flow rates through pipets is determined by the rotation of 2 stepper motors connected to rotors in up to 10 custom-designed 3D printed pumps, each capable of 2 to 100  $\mu\text{L/s}$  flow rates (Fig. 1c). Peristaltic pumps were chosen as the ideal pumping method because they do not require reconfiguration for distinct media reservoir volumes and enable fast possible pump speeds.

For programming and operating PHIL, we programmed a custom GUI. In contrast to the very complex programming skills required for most existing liquid handling robots, our GUI has been designed for easy intuitive programming by inexperienced users for precise and automated handling of any target multi-well plate design. Briefly, the Matlab GUI is divided into 4 sections: Calibration, Manual control, Scripted Procedures, and “Remote” mode. Calibration provides automated pump calibration as well as control over stepper motor speeds and settings including motion and pump flow rates. Manual control allows users to move the pipets to any location in the working area, define custom locations, and dispense defined volumes. Scripted procedures allow users to define a series of liquid

removal and dispensing commands in wells of various standard devices over time. Remote mode allows PHIL to receive triggered pipetting instructions in real time from other devices. For ease of use and a shallow learning curve, users define a target excel file that the GUI loads and reloads on a defined interval while carrying out any instructions contained within. The GUI and instructions for its operation are available online (<https://bsse.ethz.ch/csd/Hardware/PHILrobot.html>).

An Arduino Mega connected to a custom shield circuit receives commands from our GUI via USB serial communication and translates them into coordinated stepper motor rotations via an Arduino sketch (Accelstepper Arduino library) for speed and acceleration control. All electronics are housed in a custom enclosure for cable management and easy transport.

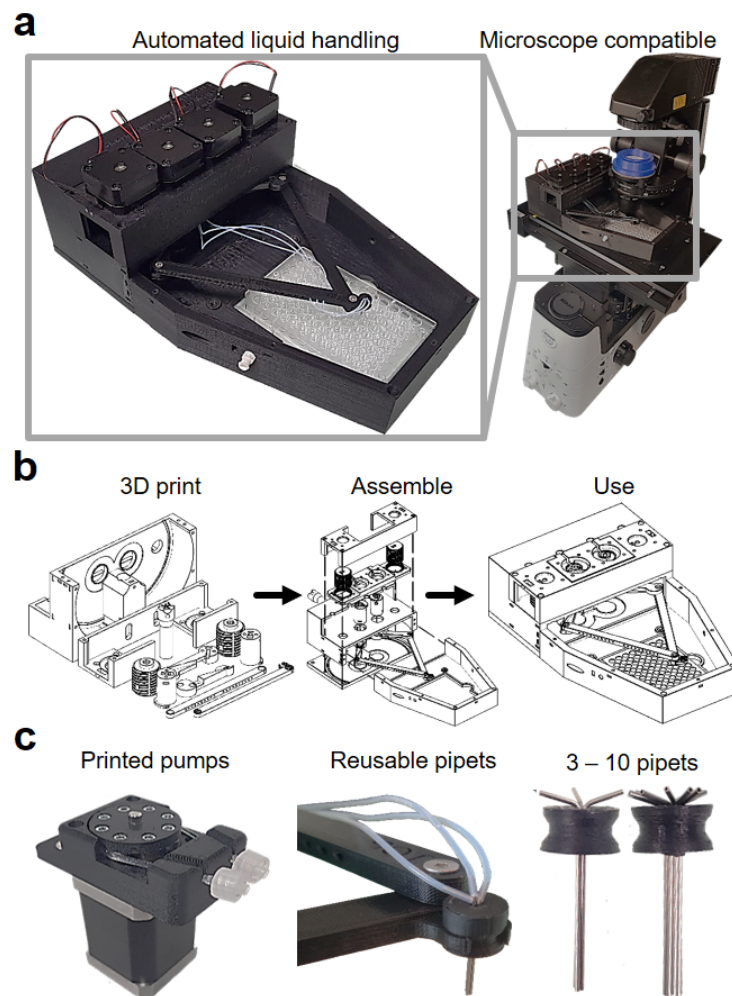

**Figure 1: PHIL, the Pipetting Helper Imaging Lid robot with a simple design for complex automated liquid handling procedures.** **a** PHIL pipets reach areas of common multi-well plate types. The small and light robot also fits microscopy stages and can automate complex live cell culture interventions without obstruct imaging. **b** All parts are commercially available or can be 3D printed using easily available equipment. Assembly is fast and requires no specialized expertise. **c** PHIL utilizes peristaltic pumps connected to reusable pipets. Peristaltic pumps assembled from 3D printed and commercial parts (left) drive flow through 3-10 reusable pipets (middle) and can accommodate between 3 and 10 pipets (right).

The cell culture vessel, robotic arms, and reusable pipets are enclosed inside a sealed incubation chamber for temperature, humidity and gas control, with standard connections for conditioned gas inputs as well as humidity and temperature sensors. It has a 2 mm thick transparent Poly(methyl methacrylate) (PMMA) window above the multi-well plate for light access in inverted microscopy.

PHIL's dimensions are ~200x300x100 mm (WxLxH); The maximum height for cell culture vessels is 45 mm, optimized for a short microscopy light path length while providing sufficient vertical space for travel of the pipet arm between e.g. wells of common multi-well plates.

PHIL has a maximum speed of 5/5/1.5 cm/s in X/Y/Z (Table 1). Common multi-well plates require 2 to 40 s for complete media replacement per well, and 4 to 13 minutes for all wells (Table 1).

| x/y                   | z         | pipet             |
|-----------------------|-----------|-------------------|
| 5 cm/s                | 1.5 cm/s  | 2 - 100 $\mu$ L/s |
| plate type            | time/well | time/plate        |
| 6 well                | 40 s      | 4.1 min           |
| 24 well               | 20 s      | 8.6 min           |
| 96 well               | 3.5 s     | 5.8 min           |
| 384 well              | 2 s       | 12.8 min          |
| ibidi $\mu$ -Slide VI | 4.5 s     | 2 min             |
| MicroAmp® PCR         | 7 s       | 8.5 min           |

**Table 1: PHIL pipet movement and liquid flow enables rapid automatic media exchange in common multi-well plate types.**

### Production and assembly of PHIL robots

All PHIL components were printed on a standard 200 mm by 200 mm build plate in 10 printing sessions with an Ultimaker 2 extended+ 3D printer using default settings (Table 2). Detailed part lists and instructions for non-experienced users are available online (<https://bsse.ethz.ch/csd/Hardware/PHILrobot.html>). Each printing session required 8 to 26 hours (Table 2). 3D printing was chosen as the ideal fabrication method due to its widespread availability, ease of open-source sharing, local reproducible production and lightweight products. All components were printed in acrylonitrile butadiene styrene (ABS) filament due to warping observed in alternative materials (PLA) when maintained at 37°C and >95% relative humidity for extended periods. The total weight of the robot body and manipulator is 953 g, compatible with commonly available automated microscope stages.

| Print Time | Weight | Footprint Area | Cost     | Assembly Time |
|------------|--------|----------------|----------|---------------|
| 7 days     | 950 g  | 20 x 30 cm     | 550 euro | 2.5 – 5 h     |

**Table 2: PHIL can be rapidly deployed with minimal expenses and expertise.** All parts can be printed in 1 week and assembled with commercial parts for under 600 euro in 2.5-5 hours. Minimal technical expertise is required for assembly and installation.

Importantly, we optimized all used electronic components for easy accessibility for inexperienced users. They can be purchased off the shelf for below 500€ and installed with minor soldering steps. Complex wiring and soldering processes were removed using an open-source printed circuit board, which can be ordered online (for ~20 USD) or produced in house (<https://bsse.ethz.ch/csd/Hardware/PHILrobot.html>) and connects directly to an Arduino Mega 2560 Rev3. To confirm the ease of production by inexperienced users, we tested device production with five separate biology PhD students with no engineering experience in our group. Following the provided instructions (Supplementary Materials and Methods), they successfully assembled working devices in 2.5 to 6 hours (Supplementary Movie 2) without further assistance.



## Robust media exchange in multi-well plates via automated pipetting

Several rounds of optimization lead to the current design as the optimal compromise between accuracy and applicability. To test the reliability and accuracy of PHIL movements, we positioned one of the pipets directly above the center of well F12 in a 96 well plate. We then moved the pipet across the whole plate to well E1 and back (240 mm travel distance) and imaged its position upon its return (Fig. 2a). Over 25 repetitions, the maximum positioning error of the pipet was 50/30  $\mu\text{m}$  in X/Y, which is less than 1/100<sup>th</sup> of a 96 well plate well diameter, and thus negligible (Fig. 2a). These error rates could be reduced even more through the use of more precisely machined metal components and servomotors, but these unnecessary improvements would increase cost and weight, thereby reducing stage-top compatibility.

Several rounds of testing identified 1/16<sup>th</sup> microstepping as the optimal balance of speed and torque for PHIL media pumps. For their calibration, we instructed each pump stepper motor to complete 100,000 1/16<sup>th</sup> microsteps, or approximately 31 full rotations, and weighed the pumped water volumes to calculate the  $\mu\text{L}$  volume per step, which was then used in the GUI.

We tested PHILs' pump accuracy by pumping 10, 25, 100, and 1000  $\mu\text{L}$  of water and weighed the pumped volumes (10 repetitions). 10, 25, 100, and 1000  $\mu\text{L}$  target volumes resulted in 7–11, 23–27, 98–101, and 998–1002  $\mu\text{L}$  samples, respectively (Fig. 2b), similar to manual pipetting and other robots.<sup>7,10,27–30</sup> The resulting volumes varied from the target volume by  $\pm 2 \mu\text{L}$  regardless of the target volume, suggesting droplet retention at the pipet tip rather than pump inaccuracies as the source of this variation (see below). When testing the impact of pumping speed on accuracy, resulting volumes were within 1–2% of the target volume for 10, 25, and 50  $\mu\text{L/s}$ . Pumping accuracy dropped to 95% at 100  $\mu\text{L/s}$  (Fig. 2b), which could be compensated for by automatic recalibration if higher accuracy is required at faster pumping speeds. The current pump design is optimized for accuracy over speed and 100  $\mu\text{L/s}$  was used as a maximum pumping rate to prevent infrequent stalling at higher flow rates. For higher flow rates, more powerful motors could easily be implemented with minor calibrations.

To further test the pipetting accuracy when mixing different input channels, we loaded one pipet with 100  $\mu\text{M}$  FITC in PBS and another with PBS. PHIL was then instructed to mix these to final concentrations of 0–100  $\mu\text{M}$  FITC in 96 well plates. These dilutions were also manually pipetted in the same plates, and the resulting FITC fluorescence was quantified via fluorescence microscopy (Fig. 2b). Mean FITC fluorescence in each condition was comparable between manually and automatically produced conditions.

Dynamic changes of cell culture media require accurate media removal and addition. To test PHILs' capacity to change media composition in standard cell culture vessels, we programmed PHIL to change the whole 100  $\mu\text{l}$  contents of 96 wells from PBS to 100  $\mu\text{M}$  FITC to PBS at 50  $\mu\text{L/s}$  and imaged the resulting fluorescence. The fluorescence quantification confirmed the expected 20 s single pulse of FITC fluorescence (Fig. 2c & Supplementary Movie 3). This was also possible in rapid succession when programming a 120 s sequence of 15 s oscillations without pauses between liquid transitions (Fig. 2d & Supplementary Movie 4).

2 h FITC:PBS oscillations over 48 h confirmed that PHIL reliably maintains dynamic culture conditions over long periods (Fig. 2e & Supplementary Movie 5). Arbitrary pipetting programs can be applied simultaneously to different wells (Fig. 2f).



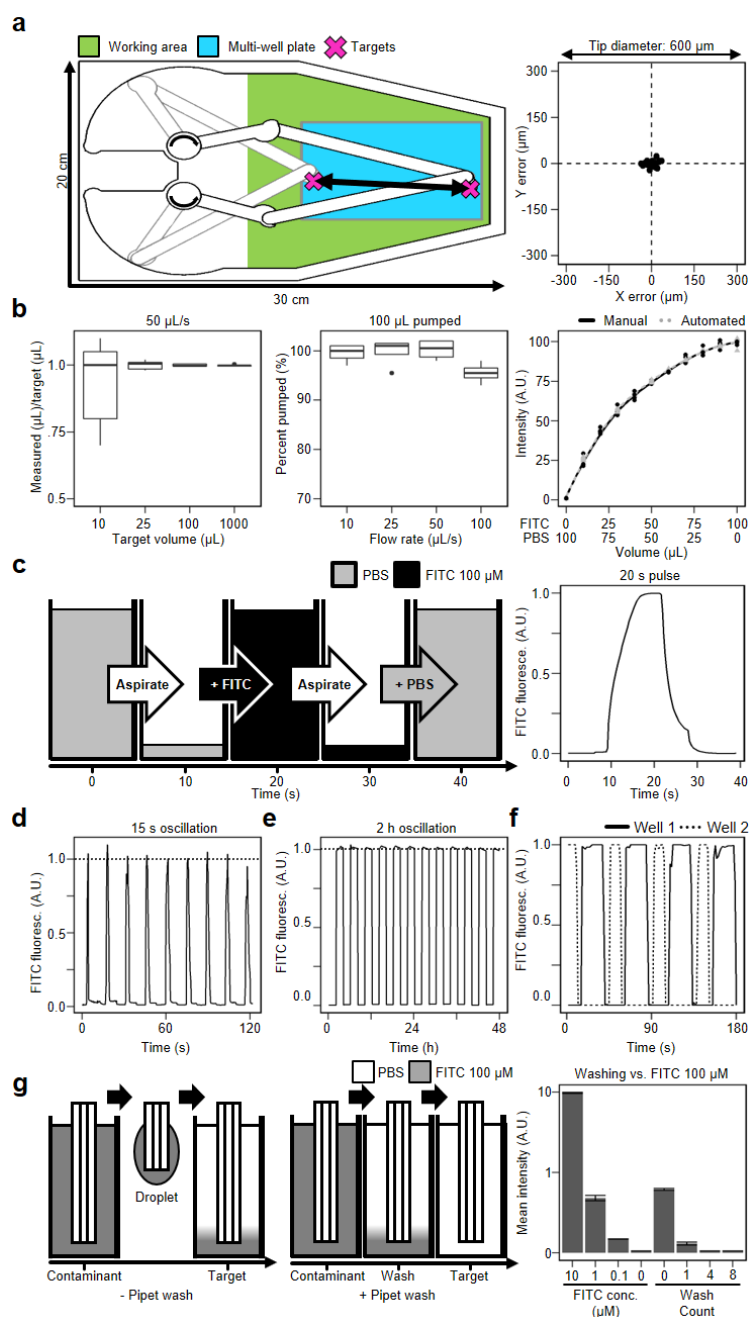

**Figure 2: PHIL reliably and accurately manipulates the contents of standard culture vessels.** **a** Pipets move to precise locations within full multi-well plate dimensions. Alternatively, this area can hold e.g. 1x 10cm dish, 4x 3cm dish, 4x ibidi channel slides, 96x PCR tubes, or any other vessel smaller than a multi-well plate. When moving between the centers of 2 wells across a 96 well plate (left), pipet locations varied by only  $\pm 50 \mu\text{m}$  in X and  $\pm 30 \mu\text{m}$  in Y (right). **b** PHIL accurately pumps precise volumes. (Left) 10, 25, 100, and 1000  $\mu\text{L}$  of pumped H<sub>2</sub>O varied from the target volume by  $\pm 1-2 \mu\text{L}$ . (Middle) 100  $\mu\text{L}$  H<sub>2</sub>O pumped at 10, 25 and 50  $\mu\text{L/s}$  varied from the target volume by  $\pm 1-2\%$ . When pumped at 100  $\mu\text{L/s}$  the target volume was  $95 \pm 2 \mu\text{L}$ . (Right) Manual and automated dilutions of 100  $\mu\text{M}$  FITC and PBS are comparable. **c** Quantification of a FITC dextran pulse over 20s. Pipets aspirate PBS (grey), add 100  $\mu\text{M}$  FITC (black), aspirate FITC, and add PBS. Mean FITC fluorescence imaged every 0.5 s reached peak fluorescence in 5 s when pumped at 50  $\mu\text{L/s}$ . **d** Rapid 15 s oscillating FITC patterns created by automated pipetting in a 96 well plate. Mean FITC fluorescence imaged every 0.5 s reached  $\pm 5\%$  of maximum fluorescence (dashed line) on a 15 s interval. **e** Consistent 2 h FITC oscillations maintained over days. Mean FITC fluorescence imaged every 5 min reached  $\pm 1\%$  of maximum fluorescence (dashed line) on a 2 h interval for 2 days. **f** Distinct FITC oscillations can be

maintained simultaneously in different wells. Mean FITC fluorescence in 2 wells imaged every 1.5 s reached  $\pm 1\%$  of maximum fluorescence during 20 s (dashed line) and 30 s (solid line) pulses. **g** Cross contamination is eliminated through automated washing procedures. (Left) Pipets carry sample droplets between wells. (Middle) Pipet washing in target medium in unused well reduces contamination. (Right) Pipet washing reduces carry-over contamination. A FITC dilution curve (left) allows inference of FITC concentration from fluorescence brightness. 0, 1, 4 and 8 wash steps (right) reduce contaminant concentration in the target well to 1, 0.1, 0.001 and 0.0001 % of the contaminant source well concentration (100  $\mu\text{M}$ ).

### Eliminating contamination during automated pipetting with reusable pipets

We chose a design with reusable pipets and instead of single-use pipets to minimize the incubation chamber height, maintain PHILs compatibility with various microscopes, and reduce design complexity. While the use of reusable pipets can cause contamination and volume changes, these are unproblematic for many applications, and can be efficiently prevented by washing procedures. To



quantify carry-over, PHIL pipets were moved from wells containing FITC solution to PBS wells and the volume of transferred FITC contaminant was measured by fluorescence microscopy (Fig. 2g). The measured carry-over was approximately 1  $\mu$ L. To reduce this contamination, we implemented an automated washing step in which pipets are washed with target media in an unused well before entering the target well (Fig. 2g). The resulting reductions in cross contamination for 1, 4, and 8 automated wash steps (requiring 3.5, 14 and 28 s, respectively) were 1:1000, 1:100,000, and >1:100,000, respectively (Fig. 2g). These contamination values are compatible with most typical experiments including immunostaining procedures, toxicology studies, and even for sensitive readouts like cytokine stimulations of live cell cultures.

PHIL can be simultaneously equipped with 3 to 10 pipets with their own separate tubing. Contamination between wells increased with pipet count with the required washing steps doubling between 3 and 10 pipets (Suppl. Fig. 3).

### **Automated immunostaining pipetting with PHIL**

Immunostaining procedures require numerous liquid exchange steps binding personnel over long periods of time and thus are ideal for automation. Having confirmed pipetting accuracy and reproducibility, we tested PHIL's ability to automate time consuming immunostainings of decalcified murine bone marrow and cerebrum. Fixed samples were subjected to automated PHIL immunostaining, and imaged by confocal microscopy (Fig. 3a). The resulting images showed immunostained subcellular features and intact structures (Fig. 3a) comparable to the result of manual staining (Suppl. Fig. 4), demonstrating successful and gentle pipetting by PHIL.

PHIL immunostaining also worked well on flow sensitive fixed single non-adherent hematopoietic progenitor cells. We sorted 3 different subsets of primary murine myeloid progenitor cell types based on GATA2VENUS fusion protein reporter expression,<sup>31</sup> seeded freshly sorted cells in 96-wells and fixed with formalin. The automated immunostaining procedure involved 10 different incubation and washing steps lasting 12 hours from four different types of staining and washing input solutions (Fig. 3b; see Materials and Methods). One sample was not incubated with primary antibody, serving as a control for cross contamination. After automated immunostaining, the samples were imaged, and single-cell fluorescence intensities were quantified (Fig. 3b). The resulting fluorescence intensity distributions of VENUS-negative, VENUS-medium and VENUS-high cells were the same between automated immunostaining and the initial FACS quantification, demonstrating the reliability and reproducibility of automated PHIL immunostaining. No signal was detected in the secondary only control, confirming the absence of cross-contamination by automated pipetting.

To quantify the ability of PHIL to handle flow-sensitive samples that require very gentle pipetting to not get washed away or displaced upon liquid exchange, we loaded anti-CD43-biotin coated<sup>32</sup> ibidi  $\mu$ -Slide VI 0.4 channel slides with freshly sorted human cord blood CD34+ HSPCs and placed them in culture for 24 h, then fixed with 4% formalin solution and washed with PBS manually and at varying automated flow speeds (Fig. 3c). Cells were imaged via fluorescence microscopy before and after washing, and the resulting change in cell counts was recorded via automated segmentation.<sup>33</sup> Manual washing by an experienced researcher was estimated to have occurred at 10  $\mu$ L/s based on observed wash volume and time (e.g., 100  $\mu$ L over 10 s). Manual washing resulted in an average cell loss of 12.6%, while automated washing significantly improved cell retention with 2  $\mu$ L/s flow rates only changing cell counts by 3.6% (Fig. 3c). Further reductions in flow rate are possible with PHIL, but increase processing times beyond what is practical for our purposes.

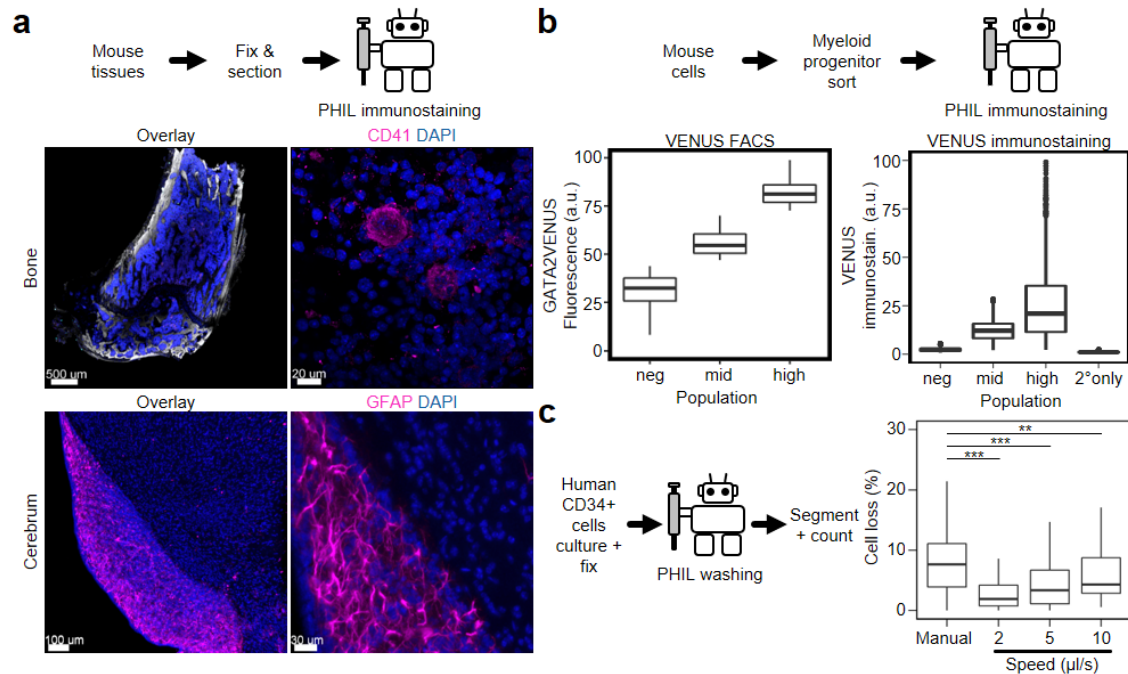

**Figure 3: PHIL successfully automates single cell and whole tissue immunostaining procedures.** **a** Fixed and cleared murine bone and cerebrum samples were sectioned before automated PHIL immunostaining and imaging. PHIL immunostaining preserved normal tissue morphology with intact macroscopic (left) and subcellular (right) features. Compare Suppl. Fig. 4 for comparison to a manually pipetted sample. **b** Murine myeloid progenitors were sorted into GATA2VENUS-negative, -middle, and -high populations, plated and fixed with 4% formalin, and PHIL immunostained against VENUS with and without primary antibodies and imaged. VENUS quantification of PHIL immunostained samples was comparable to the corresponding FACS results ( $n = 2$  experiments) and showed no antibody cross-contamination. **c** Automated washing improves cell loss for flow sensitive samples over manual pipetting. Human umbilical cord CD34+ hematopoietic stem and progenitor cells, cultured for 1 day prior to fixation, were washed manually or with 2, 5, and 10  $\mu\text{L/s}$  flow. Culture channels were imaged and counted before and after washing. Mean cell loss for manual versus 2, 5, and 10  $\mu\text{L/s}$  were 12.6 versus 3.6, 4.3, and 6.1% respectively.  $n = 2$  experiments, \*\* $p < 0.01$ , \*\*\* $p < 0.001$ .

### Automated pipetting of long-term live cell cultures.

To test PHIL's compatibility with live cell cultures, we compared cell proliferation and viability of murine embryonic stem cells (ESC) over 36 hours in 96 well plates when cultured on a microscope in PHIL versus our standard live cell microscopy incubator. The mean time to first division for ESCs cultured in our standard culture chamber and in PHIL were 12.3 and 12.5 h, respectively, while mean cell counts per input cell after 36 h were 2.6 and 2.3, respectively (Fig. 4a). Thus, incubation in PHIL did not alter ESC survival or proliferation.

To test PHIL pipetting in live cell cultures requiring very gentle pipetting, freshly sorted non-adherent primary murine granulocyte-monocyte progenitors (GMP) were imaged with and without automated media exchange. The resulting time-lapse image sequences were manually tracked to quantify cell displacement. Unwashed versus washed cells moved 2.1 versus 1.8  $\mu\text{m}$  on average (Fig. 4b), washing therefore did not displace cells. We observed no cell loss in either condition (Supplementary Movie 6) and successfully maintained all cell identities through the entire process, confirming the utility of PHIL even in live cell experiments requiring very gentle pipetting.

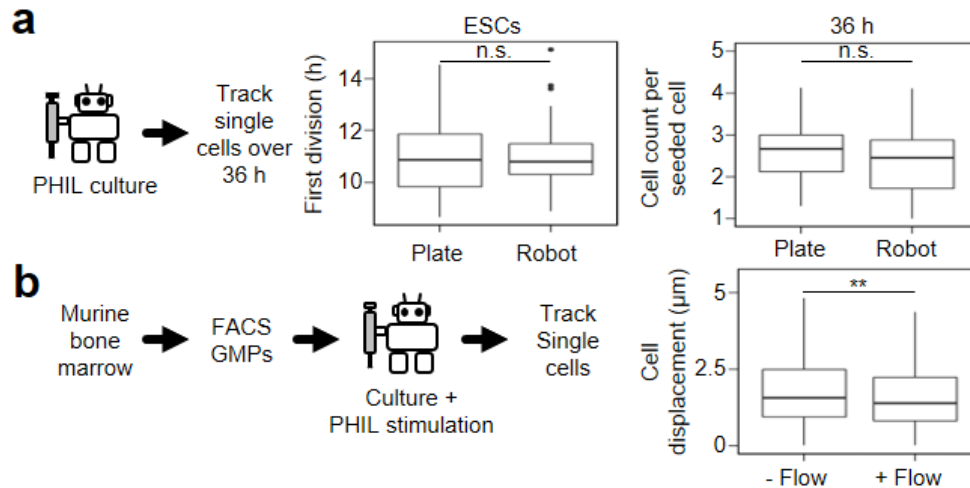

**Figure 4: PHIL successfully conducts media exchanges without disrupting sensitive samples and cell cultures.** **a** Mouse embryonic stem cells (ESCs) proliferate normally during automated PHIL culture experiments. ESCs were cultured and imaged in PHIL for 36 hours. Mean time to first division with and without PHIL were 12.3 and 12.5 h, respectively ( $p = 0.72$ , two-tailed t-test,  $n = 3$  experiments). ESC counts per seeded cell after 36 hours of culture with and without PHIL were 2.6 and 2.3 cells, respectively ( $p = 0.32$ , two-tailed t-test,  $n = 3$  experiments). **b** PHIL media exchanges do not interrupt cell tracking procedures. Murine GMPs cultured on in CD43-coated 24 well plates wells were imaged and tracked during automated media exchanges. Mean GMP movement or displacement in unwashed versus washed wells were 2.1 versus 1.8  $\mu\text{m}$  respectively did not displace cells.  $n = 3$  experiments,  $**p < 0.01$ .

## Discussion

We describe the design and performance test of an open-source automated compact lightweight and cheap liquid handling robot that can be quickly deployed with minimal investment in time and resources. Using 3D printed parts allow reduced size and weight while keeping its cost way below commercially available machines.<sup>2,3,10</sup> Several low-cost open source devices have previously been published that still require significant amounts of programming experience and are not generally compatible with stage top microscopy or other frequently used experimental techniques.<sup>3,5</sup> Here, we combine low cost, rapid deployment, and an intuitive custom open-source GUI into a single device that can be operated in a variety of lab environments. PHIL has a very compact footprint requiring less dedicated benchtop space than almost any other automated liquid handling robots<sup>1,2,6</sup>. Its robust design enables installation in temperature-controlled enclosures such as refrigerators and incubators and on microscope stages. Several motion control configurations have been utilized for automated pipetting, most frequently Cartesian systems<sup>3,5</sup> or Selective Compliance Articulated Robot Arms (SCARA),<sup>7,42</sup> but none are as compact as the 5-bar planar arm configuration used in PHIL. It reduces the required interior volume of the device enabling a reduced incubation volume and a more effective isolation of samples from ambient conditions which is crucial for demanding live cell cultures. We found this configuration to also increase the travel speeds between target locations.

PHILs ability to reliably and accurately manipulate the contents of common culture vessels on extremely short time intervals, over long periods, and in multiple parallel vessels is comparable to commercial devices.<sup>1,2</sup> To simplify pipetting procedures and reduce the risk of cross contamination between samples, PHIL utilizes dedicated pipets for each of the up to 9 dispensed liquid channels instead of a single pipet connected to multiple pumps. When a single pipet is utilized for serial liquid dispensing, dead volumes present in pipet connections can lead to the incomplete removal of one liquid prior to the addition of another. This issue would have to be prevented by large volume tube washing with the target fluid prior to dispensing. However, many experimental procedures utilize very expensive reagents and keeping used volumes as low as possible is crucial. In addition, the risk of sample contamination associated with a single pipet configuration would limit the experimental

complexity PHIL can achieve. Due to the modular design of the pipet mounting bracket and simplicity of our GUI, researchers can easily modify the provided 3D models to choose between configurations with 1-10 separated pipets and liquid channels.

Using a design without removable pipet tips can result in contamination from liquid droplets clinging to the tips of the pipets as they move from well to well. The volume of these droplets increases with increasing numbers of pipets in the bundle. The number of pipets should therefore be reduced to the minimal number required for different experiments. Cross contamination is efficiently reduced by user defined pipet washing procedures between pipetting steps. The remaining extremely low carry over between wells is irrelevant for most experiments, but must be quantified and controlled for sensitive analytical experiments.

Our device is highly scalable and versatile. PHILs 2.5-5 h assembly time, 500 € price, and 20 x 30 cm footprint mean that inexperienced users can rapidly deploy multiple devices for streamlined sample processing workflows or dedicated workstations. The modular design which allows the robot to be printed on any 3D printer and easily assembled also allows for novel geometries and functionalities to be added with minimal effort. Altering characteristics like pump count, chamber height, and arm geometries can be accomplished with simple 3D modelling software. Our 3D printed peristaltic pumps can accept any liquid reservoir and allow users to rapidly change their experimental configurations without extensive modification of the pumps or pump calibrations. Their accuracy is comparable to commercial and DIY alternatives<sup>11,43</sup> and our GUI precisely controls pump speeds when handling flow sensitive samples. For additional flexibility, PHIL can utilize any stepper motor-driven pump by using the pump calibration tool implemented in our GUI. Additionally, the miniaturized nature of the robot also allows to chain many of them together for more complex workflows. The modular design of the pipets and robot arm also allows the inclusion of novel actuators including LEDs for optogenetic experiments, electromagnets for magnetic cell separation experiments, or anode/cathode pairs for electroporation. The modular design of the incubation chamber enables the inclusion of other complex machinery within the device such as tube holders for automated sample aliquoting.

PHILs potential applications are not limited to the examples explored here. With a sealed incubation enclosure that can easily be connected to external temperature, gas and humidity control equipment, PHIL can be applied to many other experimental procedures. These include simulated co-cultures by transferring fluids between wells, dividing single cultures into multiple wells for separate treatments, real-time automated cell culture interventions based on observed cell culture phenomena, and the sequential staining of fixed samples over many cycles without sample loss or displacement. PHILs versatility and open source design make it ideal for exploring novel small-scale experimental protocols without large cost, space and time investment in a wide range of experimental laboratories.

## Methods

### PHIL design and fabrication

Using AutoCAD (Autodesk Inc.) we designed a 3D printable 5-bar planar robot and printed all components on an Ultimaker 2 extended+ 3D printer (Part number: UM2EXTPLUS, Ultimaker B.V. Netherlands) with 3Djake niceABS black (niceshops GmbH). Slicing and gcode generation was done in Cura (Ultimaker B.V. Netherlands) using generic ABS settings. Models were printed with a 0.4 mm nozzle, 0.15 mm layer height and 18% infill except the arm mounting brackets which were printed with 100% infill. Briefly, all printed parts were assembled into the final product using standard 8, 10, and 16 mm M3 flathead screws to attach motors and printed parts. Stepper motors on the main body were 23mm NEMA 17 stepper motors (part number: 17HS0423). Peristaltic pumps were driven by 60mm NEMA 17 stepper motors (part number: 17HS6002). Each motor is driven by a dedicated stepstick DRV8825 stepper driver and powered by a 24 V 15 A power supply connected to the Arduino Mega Shield. Limit switches were installed on the main body and robot arms using 10 mm M1.5 screws. The 24 V 15 A power supply is mounted in a 3D printed enclosure along with an Arduino Mega 2560 Rev3 (Arduino, A000067) and custom shield with 10 mm M4 flathead screws. Each pipet was connected to its corresponding pump using 0.56 X 1.07mm PTFE-tubing (Thermo Fisher, W39241). Pipets were produced by bending 0.6 mm x 0.3 mm x 25 mm (ODxIDxL) stainless

steel tubing (New England Small Tube Corp. NE-1310-03) in a custom 3D printed bending apparatus. A complete set of production and assembly instructions are available online (<https://bsse.ethz.ch/csd/Hardware/PHILrobot.html>).

### **PHIL control**

Our graphic user interface was implemented in MatLAB (The MathWorks Inc.) as a single script. Briefly, we programmed a simple model of our device using the Robotics System Toolbox (The MathWorks Inc.) which, when given a single XY position within the working area of our device, generates two angular rotations for the primary arms to position the pipets in the desired location. These rotations are then compared to the current configuration of the arms and the desired step counts and directions are sent to the Arduino via serial communication. The Arduino then implements those steps via a custom script written using the Accelstepper Arduino library (<https://www.airspayce.com/mikem/arduino/AccelStepper/index.html>). Our GUI and Arduino script as well as instructions for their implementation are available online (<https://bsse.ethz.ch/csd/Hardware/PHILrobot.html>).

### **PHIL motion calibration**

Pipet positioning accuracy was conducted by filling a single pipet with 100  $\mu$ M FITC (F6377-100G, Sigma-Aldrich) in PBS and positioning it in the center of well F12 in a 96 well plate (Greiner-CELLSTAR®-96-Well) approximately 0.1 mm above the bottom of the well. FITC fluorescence within the pipet as it moved away from this location and returned was imaged every 1 s on a Nikon Ti-Eclipse inverted microscope that was equipped with an Orca Flash 4.0 camera (Hamamatsu Photonics K.K.), using a 10 $\times$  objective (NA 0.45) (Nikon Instruments Europe B.V.) and pipet location was recorded using custom scripts written for Youscope ([www.youscope.org](http://www.youscope.org)).

### **Pipet surface treatment**

Pipets were treated with oxygen-plasma at 15 W for 2 min and wetted with 1% TMCS. Pipets were then placed on a hot plate held at 90°C until dry.

### **Cleaning PHIL**

PHIL was cleaned between experiments using a preprogrammed script. Briefly, a 6 well plate containing 6 mL FACS Clean (Thermo Fisher, BD 340345), 6 mL FACS Rinse (Thermo Fisher, BD 340346), 6 mL 80% ethanol, and 6 mL diH<sub>2</sub>O in separate wells was loaded into the working area. PHIL then pipetted 2 mL per pipet from each well by running the corresponding pump in reverse. After cleaning each pump was run in reverse until all Teflon tubing was dry.

### **Pump calibration**

Pumped volume accuracies were determined by pumping 10, 25, 100, and 1000  $\mu$ Ls of diH<sub>2</sub>O into 1.5 mL MaxyClear snaplock microcentrifuge tubes (MCT-150-A, Corning Inc.) which were weighed before and after to determine the true pumped volume ( $n = 10$  repetitions per condition). Maximum flow rate calculations were determined by pumping 100  $\mu$ L diH<sub>2</sub>O into PCR tubes at 10, 25, 50, and 100  $\mu$ L/s which were weighed before and after to determine true volume pumped. Automated FITC dilution curves were generated by loading pipets with 100  $\mu$ M FITC in PBS and PBS before pipetting 0 – 100  $\mu$ M FITC solutions in 96 well plates (Greiner-CELLSTAR®-96-Well) in 10  $\mu$ M increments. FITC fluorescence was imaged on a Nikon Ti-Eclipse inverted microscope equipped with an Orca Flash 4.0 camera (Hamamatsu Photonics K.K.), using a 10 $\times$  objective (NA 0.45) (Nikon Instruments Europe B.V.).

### **Dynamic media exchange**

PHIL pumps connected to PBS and 100  $\mu$ M FITC (Sigma-Aldrich, F6377-100G) in PBS filled 96 well plate (Greiner-CELLSTAR®-96-Well) wells with 100  $\mu$ L PBS. PHIL then aspirated the well contents, added 100  $\mu$ L 100  $\mu$ M FITC, aspirated, and added 100  $\mu$ L PBS over various periods and intervals. All volumes were pumped at 50  $\mu$ L/s. FITC fluorescence was imaged on a Nikon Ti-Eclipse inverted microscope equipped with an Orca Flash 4.0 camera (Hamamatsu Photonics K.K.), using a 10 $\times$  objective (NA 0.45) (Nikon Instruments Europe B.V.).



### **Human hematopoietic stem and progenitor cell isolation**

Human cord blood cells were processed by density gradient centrifugation, and CD34<sup>+</sup> cells were isolated using EasySep™ CD34 positive selection kit II (samples from Basel, Cat# 17896, Stemcell Technologies, Vancouver, BC, Canada).

### **Human hematopoietic stem and progenitor cell cultures**

HSPCs were cultured as previously described<sup>21</sup>. Cells were cultured in phenol red free Iscove's Modified Dulbecco's Medium (IMDM, Gibco #21056-023) supplemented with 20% BIT (Stemcell Technologies), 100 ng/mL human recombinant Stem Cell Factor (SCF, #255-SC), 50 ng/mL human recombinant Thrombopoietin (TPO, #288-TP), 100 ng/mL human Fms-related tyrosine kinase 3 ligand (Flt3L, #308-FK, all R&D Systems), 2 mM L-GlutaMAX (Gibco #35050-038), 100 U/mL penicillin and 100 µg/mL Streptomycin (Gibco #15140-122), and 4µg/mL low density lipoproteins (Stem Cell Technologies #02698), 55 µM 2-mercaptoethanol (Gibco). Cells were fixed on µ-Slide VI<sup>0.4</sup> (#80606, Ibidi GmbH) slides coated for 1 h with 10 µg/mL anti-CD43-biotin (MEM-59, ExBio) in PBS. Washing steps were conducted with PBS.

### **ESC culture**

R1 NanogVenus cells were routinely cultured in SerumLIF media on 0.1% gelatin (Sigma-Aldrich, G1890-100G) coated plates.<sup>44,45</sup> SerumLIF media consists of 10% FCS (PAN, P30-2602), 10ng/ml LIF (Cell guidance Systems, GFM200-1000), 2mM GlutaMAX (Thermo Fisher, 35050-038), 1% non-essential amino acids (Thermo Fisher, 11140-035), 1mM sodium pyruvate (Sigma-Aldrich, S8636) and 50µM β-mercaptoethanol (Sigma-Aldrich, M6250) in DMEM (Thermo Fisher, 11960-085) basal media. E cadherin (Primorigen Biosciences, S2112-500UG) was added at 0.4 µg/100 µL PBS++ per well for coating and incubated for 1 h at 37 °C. Cells were seeded in SerumLIF in 96 well plates (Ibidi, 89626) coated with E-cadherin prior to stimulation experiments. The media during imaging is the same as routine culture media except basal media is phenol red free DMEM (D1145). ESC culture experiments were conducted on environmentally controlled microscopes maintained at 37 °C using a feedback-controlled heating unit (Life Imaging Services) installed in aluminium-slot frame boxes lined with black, foamed insulation-boards. Humidity (>98%) and gas composition (5% CO<sub>2</sub>, 5% O<sub>2</sub>, 90% N<sub>2</sub>, PanGas) were maintained by constantly flowing 1 mL/h mixed gas into PHIL through a previously reported 3D printed temperature controlled air humidifier<sup>23</sup> containing roughly 100 mL of diH<sub>2</sub>O at 37 °C (<https://bsse.ethz.ch/csd/Hardware/3DPHumidifier.html>). Relative humidity was recorded using a data logger (Sensirion, SHT31-DIS-B).

### **Mice**

Experiments were conducted with 12-16-weeks old male GATA2VENUS and GFP-p65/H2B-mCHERRY mice. Transgenic mice were previously published.<sup>31</sup> Mice were acclimatized for at least 1 week before the start of an experiment. Mice were supplied with environmental enrichment and housed with an inverse 12 h day–night cycle in a temperature (21 ± 2 °C) and humidity (55 ± 10%) controlled room with ad libitum access to standard diet and drinking water at all times in individually ventilated hygienic cages with 2–5 mice per cage. The general well-being of the mice was routinely monitored by animal facility caretakers by daily visual inspections. Mice were euthanized if symptoms of pain and/or distress were observed. Mice were randomly assigned to experimental groups and in some cases pooled for experiments to reduce biological variability. Animal experiments were approved according to Institutional guidelines of ETH Zurich and Swiss Federal Law by veterinary office of Canton Basel-Stadt, Switzerland (approval no. 2655).

### **Murine myeloid progenitor and GMP isolation**

Primary cells were isolated and sorted as previously described.<sup>31,46–48</sup> In brief, femurs, tibiae, coxae, and vertebrae were isolated and crushed in PBS (2% FCS, 2 mM EDTA) and filtered through a 40-µm nylon mesh. Erythrocytes were lysed for 3 min on ice in ACK lysing buffer (Lonza), stained with biotinylated lineage antibodies against CD3e (145-2C11), CD19 (eBio1D3), TER-119 (TER-119), B220 (RA3-6B2), Ly-6G (RB6-8C5) and CD11b (M1/70), and labelled with streptavidin-conjugated magnetic beads (Roti-MagBeads, Roche) before immuno-magnetic depletion. For isolation of GFP-p65 GMPs, cells were stained with CD16/32-PerCp-Cy5.5 (Biolegend, Clone 93), Sca1-Pacific Blue (Biolegend, Clone D7), cKit-BV510 (Biolegend, Clone 2B8), CD150-BV650 (Biolegend, Clone TC15-12F12.2), streptavidin-BV711 (BD Biosciences), CD34-eFluor660 (Invitrogen, Clone RAM34)



and CD48-APCeFl780 (Invitrogen, Clone HM48-1). For isolation of GATA2VENUS myeloid progenitors, cells were stained with CD16/32-APCCY7 (Biolegend, Clone 93), Sca1-PacBlue (Biolegend, Clone D7), cKit-BV711 (BD Biosciences, Clone 2B8), CD150-BV650 (Biolegend, Clone TC15-12F12.2), streptavidin-BV570 (Biolegend), CD41-PerCPeFL710 (eBioscience, Clone MWReg30) and CD105-APC (Biolegend, Clone MJ7/18). Cells were stained for 90 min on ice and sorted using a BD FACS Aria I or III with 70- $\mu$ m nozzle, single-cell purity mode and sorting purities  $\geq$  98%.

### **GMP culture**

Primary murine hematopoietic cells were isolated from GFP-p65/H2B-mCHERRY transgenic mice described above. Cells were cultured before and during time-lapse movies in 4-well micro-inserts (Ibidi) within a 24 well plate with glass bottom (Greiner). Before the start of cultures, the plate was coated with 10  $\mu$ g/ml anti-CD43-biotin antibody for 2h at RT in order to reduce cell movement.<sup>32,49</sup> After washing with PBS, 1mL of IB20/SI media (IB20 = custom IMDM without riboflavin (Thermo Fisher) supplemented with 20% BIT (Stem Cell Technologies), 50 U/mL Penicillin, 50  $\mu$ g/mL Streptomycin (Gibco), GlutaMAX (Gibco), 2-Mercaptoethanol (50uM, Gibco); SI = 100 ng/mL murine SCF + 10 ng/mL murine IL-3 (both Peprotech)) was added per well and cells were cultured at 37°C and 5% CO<sub>2</sub>. For GMP displacement experiments all GMPs were imaged for 1 h before half the wells were washed with 1 mL base media at 50  $\mu$ L/s. Cells were manually tracked and changes in motility in washed and unwashed wells determined using R.

### **Confocal time-lapse imaging**

Time-lapse imaging experiments with live GMP cultures were conducted at 37°C, 5% O<sub>2</sub> and 5% CO<sub>2</sub> with detailed media conditions described above using a Nikon A1 confocal microscope. Images were acquired using the green (mCherry, 1% intensity) laser, custom mCherry emission filter settings, and a 20x CFI Plan Apochromat  $\lambda$  objective. During time-lapse movies, images were acquired every 9 min for 12h.

### **Image quantification and analyses**

12-bit images with 2,048  $\times$  2,048-pixel resolution were saved in .tiff format and linearly transformed to 8-bit using channel-optimized white points. Nuclear segmentation was accomplished using images of the mCherry channel and fastER<sup>33</sup>. Trained labelling masks were eroded (settings: dilation -2) to ensure that the segmented nuclei contained no cytoplasm. Tracking and quantification of fluorescence channels was accomplished as previously described<sup>50</sup>, and analysed using R 3.4.2 (R-Project). Time series of each channel were generated using mean intensities of the segmented areas. Data from all cells were organized in a single data frame.

### **Automated immunostaining of GATA2VENUS in myeloid progenitors**

Immunostaining of VENUS fluorescent protein in myeloid progenitors was performed according to protocols as described.<sup>31,34,51</sup> Briefly, different subsets of myeloid progenitors based on VENUS expression were sorted by FACS (BD ARIA III), directly seeded on (10  $\mu$ g/ml) anti CD43-biotin antibody coated plastic-bottom 96 well plates (Greiner Bio-one), stored for 30 min at 4°C and fixed with 4% paraformaldehyde (Sigma Aldrich) for 10 min at RT. The automated washing procedure conducted by PHIL consisted of 3x washing step with 100  $\mu$ L PBS, 2x permeabilization steps with 100  $\mu$ L TBS-T (0.1 % Tween (Sigma Aldrich) + 0.2% triton-X (Applichem) in TBS buffer), 1 h incubation at RT with 100  $\mu$ L blocking buffer (10 % donkey serum (Jackson Immuno research) in TBS-T), incubated with 100  $\mu$ L of 4 $\mu$ g/ml chicken-anti GFP primary antibody (Aves) in blocking buffer overnight at RT, washed 3x with 100  $\mu$ L TBS-T, stained with 100  $\mu$ L donkey-anti chicken Alexa 488 secondary antibody (10  $\mu$ g/ml dilution in TBS-T) for 1h, incubated with 100  $\mu$ L DAPI (1:1000 in blocking buffer), washed 3x with 100  $\mu$ L TBS-T, followed by final incubation in TBS before imaging. Images were acquired on a Nikon Eclipse Ti-E microscope using Lumencore light source with 0.7x camera adapter and 10X objective with 0.45 NA (Plan Apo) and analyzed using bioimaging pipeline described below.

### **Bioimaging pipeline for image acquisition, detection and quantification**

Fluorescence images of immunostained myeloid progenitors were acquired on Nikon Eclipse Ti-E

microscope in an automated manner using custom written software. To quantify the signal of anti-VENUS immunostaining in single cells, background signal was normalized by using BaSiC tool as previously described<sup>52</sup> and segmentation of cells was performed on DAPI signal. Finally, quantification of anti-VENUS immunostaining signal was performed using fastER segmentation tool as described<sup>33</sup>. Data was analyzed using custom written R scripts.

### **Tissue preparation for automated immunostaining**

Murine bone marrow were sectioned as described before.<sup>53</sup> Brain was prepared in the same way, only without decalcification. Briefly, tissues were fixed in freshly prepared 4% methanol-free formaldehyde solution (Thermo Scientific, Cat# 28906) for 24 hours directly after dissection. Bones were submerged in 10% EDTA, pH 8 (BioSolve, Cat# 0005142391BS) for 14 days to decalcify. Tissues were embedded in 4% low gelling temperature agarose (Merck, Cat#A 0169) and sectioned by vibratome (Leica VT1200 S) into 100-150  $\mu$ m thick sections.

### **Automated immunostaining tissues with PHIL**

Automated immunostainings were performed at room temperature in double side adhesive silicon chambers (Merck, Cat# GBL620003) attached on superfrost glass slides (VWR). Samples were fixed, bones decalcified, sectioned, and placed on glass slides as previously described.<sup>53</sup> Tissue sections were blocked and permeabilized with TBS (0.1M Tris, 0.15 M NaCl, pH 7.5) containing 10% donkey serum (Jackson ImmunoResearch, 017-000-121), 0.05% Tween-20 (Merck, P9416) and 0.1% Triton X-100 (PanReac AppliChem, A1388) for 2 hours before addition of 200  $\mu$ L primary antibody solutions. Bone primary antibody solution contained, goat anti-Collagen 1 IgG (Southern Biotech, 1310-01), rat anti-CD41 IgG (eBioscience, 16-0411-85), and DAPI (Merck, D9542) to visualize bone surface, megakaryocytes and cell nucleus respectively. Cerebrum primary antibody solution contained mouse anti-GFAP IgG (R&D Systems, MAB2594) and DAPI to visualize astrocytes and cell nucleus respectively. Sections were incubated in primary antibodies for 15 h before 4 wash cycles with 200 $\mu$ L washing solution composed of TBS containing 0.05% Tween-20. Sections were then incubated in 200  $\mu$ L secondary antibody solution for 2 h. Bone secondary antibody solution contained Alexa Fluor 647 donkey anti-goat IgG (Invitrogen, A-21447) and Alexa Fluor 555 donkey anti-rat IgG (Invitrogen, A-48270). Cerebrum secondary antibody solution contained Alexa Fluor 546 donkey anti-mouse IgG (Invitrogen, A-10036). Secondary antibody solutions were washed away using 200  $\mu$ L washing solution as above. Primary and secondary antibodies were diluted in the same blocking buffer described above. Sections were mounted in homemade mounting medium (80% Glycerol (PanReac AppliChem, A1123) in TBS containing 0.2 M N-propyl gallate (Merck, 02370), pH 8.5) with a size 1.5 coverslips (TedPella).

### **Confocal microscopy for immunostained tissues**

Images were acquired on a Leica TCS SP8 confocal microscope using Leica type G immersion liquid with a 63x glycerol immersion lens (NA 1.3, FWD 0.28 mm). The scans were performed at 400 Hz, room temperature, in bidirectional mode at 1024x1024 pixel resolution. Only HyD detectors were used for signal acquisition.

### **Code availability**

PHIL follows open-source software and hardware standards. The steps to assemble a complete functioning system and corresponding software are described online (<https://bsse.ethz.ch/csd/Hardware/PHILrobot.html>).

### **Data availability**

The data that support the findings of this study are available from the corresponding author upon reasonable request.

## References

1. Holland, I. & Davies, J. A. Automation in the Life Science Research Laboratory. *Front. Bioeng. Biotechnol.* **8**, 1326 (2020).
2. Kong, F., Yuan, L., Zheng, Y. F. & Chen, W. Automatic liquid handling for life science: A critical review of the current state of the art. *J. Lab. Autom.* **17**, 169–185 (2012).
3. Faiña, A., Nejati, B. & Stoy, K. Evobot: An open-source, modular, liquid handling robot for scientific experiments. *Appl. Sci.* **10**, 814 (2020).
4. Groschl, M. *et al.* A Liquid Handling Robot for Robust and Reproducible Preparation of Standard and Quality Control Samples in Bioanalysis. *Adv. Robot. Autom.* **06**, (2017).
5. Florian, D. C., Odziomek, M., Ock, C. L., Chen, H. & Guelcher, S. A. Principles of computer-controlled linear motion applied to an open-source affordable liquid handler for automated micropipetting. *Sci. Rep.* **10**, 13663 (2020).
6. Gerber, L. C. *et al.* Liquid-handling Lego robots and experiments for STEM education and research. *PLoS Biol.* **15**, e2001413 (2017).
7. Gome, G., Waksberg, J., Grishko, A., Wald, I. Y. & Zuckerman, O. OpenLH: Open liquid-handling system for creative experimentation with biology. in *TEI 2019 - Proceedings of the 13th International Conference on Tangible, Embedded, and Embodied Interaction* 55–64 (ACM, 2019). doi:10.1145/3294109.3295619.
8. May, M. A DIY approach to automating your lab. *Nature* vol. 569 587–588 (2019).
9. Barthels, F., Barthels, U., Schwickert, M. & Schirmeister, T. FINDUS: An Open-Source 3D Printable Liquid-Handling Workstation for Laboratory Automation in Life Sciences. *SLAS Technol.* **25**, 190–199 (2020).
10. Opentrons. Opentrons | Open-source Lab Automation, starting at \$5,000 | Opentrons. <https://opentrons.com/> (2020).
11. Almada, P. *et al.* Automating multimodal microscopy with NanoJ-Fluidics. *Nat. Commun.* **10**, 1–9 (2019).
12. Lagoy, R. C. & Albrecht, D. R. Automated fluid delivery from multiwell plates to microfluidic devices for high-Throughput experiments and microscopy. *Sci. Rep.* **8**, 6217 (2018).
13. Mehling, M. & Tay, S. Microfluidic cell culture. *Curr. Opin. Biotechnol.* **25**, 95–102 (2014).
14. Kellogg, R. A., Gómez-Sjöberg, R., Leyrat, A. A. & Tay, S. High-throughput microfluidic single-cell analysis pipeline for studies of signaling dynamics. *Nat. Protoc.* **9**, 1713–26 (2014).
15. Thorsen, T., Maerkl, S. J. & Quake, S. R. Microfluidic large-scale integration. *Science* (80-. ). **298**, 580–584 (2002).
16. Kellogg, R. A. & Tay, S. Noise facilitates transcriptional control under dynamic inputs. *Cell* **160**, 381–392 (2015).
17. Mukhopadhyay, R. *When PDMS isn't the best.* *Analytical Chemistry* vol. 79 3249–

- 3253 (American Chemical Society, 2007).
18. Chumbimuni-Torres, K. Y. *et al.* Adsorption of proteins to thin-films of PDMS and its effect on the adhesion of human endothelial cells. *RSC Adv.* **1**, 706–714 (2011).
  19. Toepke, M. W. & Beebe, D. J. PDMS absorption of small molecules and consequences in microfluidic applications. *Lab on a Chip* vol. 6 1484–1486 (2006).
  20. Greci, G., Bertocchi, C. & Ravasio, A. Integrating microfabrication into biological investigations: The benefits of interdisciplinarity. *Micromachines* vol. 10 252 (2019).
  21. Lecault, V., White, A. K., Singhal, A. & Hansen, C. L. Microfluidic single cell analysis: From promise to practice. *Current Opinion in Chemical Biology* vol. 16 381–390 (2012).
  22. Dettinger, P. *et al.* Automated Microfluidic System for Dynamic Stimulation and Tracking of Single Cells. *Anal. Chem.* **90**, 10695–10700 (2018).
  23. Dettinger, P. *et al.* An automated microfluidic system for efficient capture of rare cells and rapid flow-free stimulation. *Lab Chip* **20**, 4246–4254 (2020).
  24. Cambier, T. *et al.* Design of a 2D no-flow chamber to monitor hematopoietic stem cells. *Lab Chip* **15**, 77–85 (2015).
  25. Lecault, V. *et al.* High-throughput analysis of single hematopoietic stem cell proliferation in microfluidic cell culture arrays. *Nat. Methods* **8**, 581–589 (2011).
  26. Kobel, S., Valero, A., Latt, J., Renaud, P. & Lutolf, M. Optimization of microfluidic single cell trapping for long-term on-chip culture. *Lab Chip* **10**, 857–863 (2010).
  27. Councill, E. E. A. W. *et al.* Adapting a Low-Cost and Open-Source Commercial Pipetting Robot for Nanoliter Liquid Handling. *SLAS Technol.* **26**, 311–319 (2021).
  28. Bogue, R. Robots in the laboratory: A review of applications. *Ind. Rob.* **39**, 113–119 (2012).
  29. Chapman, T. Lab automation and robotics: Automation on the move. *Nature* **421**, 661–666 (2003).
  30. Longwell, S. A. & Fordyce, P. M. MicrIO: An open-source autosampler and fraction collector for automated microfluidic input-output. *Lab Chip* **20**, 93–106 (2020).
  31. Ahmed, N. *et al.* A Novel GATA2 Protein Reporter Mouse Reveals Hematopoietic Progenitor Cell Types. *Stem Cell Reports* **15**, 326–339 (2020).
  32. Loeffler, D. *et al.* Mouse and human HSPC immobilization in liquid culture by CD43- or CD44-antibody coating. *Blood* **131**, 1425–1429 (2018).
  33. Hilsenbeck, O. *et al.* FastER: A User-Friendly tool for ultrafast and robust cell segmentation in large-scale microscopy. *Bioinformatics* **33**, 2020–2028 (2017).
  34. Etzrodt, M. *et al.* Inflammatory signals directly instruct PU.1 in HSCs via TNF. *Blood* **133**, 816–819 (2019).
  35. Wang, W. *et al.* Cytokine combinations for human blood stem cell expansion induce cell type- and cytokine-specific signaling dynamics. *Blood* (2021) doi:10.1182/blood.2020008386.
  36. Endele, M. *et al.* CSF-1-induced Src signaling can instruct monocytic lineage choice.

- Blood* **129**, 1691–1701 (2017).
37. Chavez, J. S. *et al.* PU.1 enforces quiescence and limits hematopoietic stem cell expansion during inflammatory stress. *J. Exp. Med.* **218**, (2021).
  38. Pietras, E. M. *et al.* Chronic interleukin-1 exposure drives haematopoietic stem cells towards precocious myeloid differentiation at the expense of self-renewal. *Nat. Cell Biol.* **18**, 607–618 (2016).
  39. Frick, C. *et al.* Nano-scale microfluidics to study 3D chemotaxis at the single cell level. *PLoS One* **13**, (2018).
  40. De Lorenzi, R., Gareus, R., Fengler, S. & Pasparakis, M. GFP-p65 knock-in mice as a tool to study NF- $\kappa$ B dynamics in vivo. *Genesis* **47**, 323–329 (2009).
  41. Ma, Y. *et al.* A novel recombinant slow-release TNF  $\alpha$ -derived peptide effectively inhibits tumor growth and angiogenesis. *Sci. Rep.* **5**, 1–17 (2015).
  42. Choi, B. J. *et al.* Development of Flexible BioRobot Platform for Integrated Clinical Test. *J. Lab. Autom.* **13**, 90–96 (2008).
  43. Byun, C. K., Abi-Samra, K., Cho, Y. K. & Takayama, S. Pumps for microfluidic cell culture. *Electrophoresis* **35**, 245–257 (2014).
  44. Filipczyk, A. *et al.* Network plasticity of pluripotency transcription factors in embryonic stem cells. *Nat. Cell Biol.* **17**, 1235–1246 (2015).
  45. Filipczyk, A. *et al.* Biallelic expression of nanog protein in mouse embryonic stem cells. *Cell Stem Cell* **13**, 12–13 (2013).
  46. Cabezas-Wallscheid, N. *et al.* Identification of regulatory networks in HSCs and their immediate progeny via integrated proteome, transcriptome, and DNA Methylation analysis. *Cell Stem Cell* **15**, 507–22 (2014).
  47. Oguro, H., Ding, L. & Morrison, S. J. SLAM family markers resolve functionally distinct subpopulations of hematopoietic stem cells and multipotent progenitors. *Cell Stem Cell* **13**, 102–116 (2013).
  48. Pronk, C. J. H. *et al.* Elucidation of the Phenotypic, Functional, and Molecular Topography of a Myeloerythroid Progenitor Cell Hierarchy. *Cell Stem Cell* **1**, 428–442 (2007).
  49. Loeffler, D. *et al.* Asymmetric lysosome inheritance predicts activation of haematopoietic stem cells. *Nature* **573**, 426–429 (2019).
  50. Hilsenbeck, O. *et al.* Software tools for single-cell tracking and quantification of cellular and molecular properties. *Nat. Biotechnol.* **34**, 703–706 (2016).
  51. Hoppe, P. S. *et al.* Early myeloid lineage choice is not initiated by random PU.1 to GATA1 protein ratios. *Nature* **535**, 299–302 (2016).
  52. Peng, T. *et al.* A BaSiC tool for background and shading correction of optical microscopy images. *Nat. Commun.* **8**, 1–7 (2017).
  53. Coutu, D. L., Kokkaliaris, K. D., Kunz, L. & Schroeder, T. Multicolor quantitative confocal imaging cytometry. *Nat. Methods* **15**, 39–46 (2018).

## **Acknowledgements**

We thank the D-BSSE single cell facilities for technical support. This work was supported by Swiss National Science Foundation grants 179490 and 186271 to T. S.

## **Author Contributions**

P.D. designed and implemented the robot hardware, control software, and environmental control apparatus. T.S., N.A., F.S., T.K., and Y.Z. provided feedback improving the functionality and user experience of the system. Y.Z. produced murine tissue staining data, N.A. myeloid progenitor immunostaining data, F.S. cord blood washing data, and G.A. embryonic stem cell culture data. A.W., D.S., Y.Z., and F.S. provided feedback on the robot assembly process. S.K. provided biological samples. T.S. and D.L. developed continuous quantitative single-cell imaging and maintained it with T.K.. T.S. designed and supervised the project.

## **Ethics Declarations**

The authors declare no competing interests.
